# Supplementary material for: Soil-atmosphere exchange flux of total gaseous mercury (TGM) in subtropical and temperate forest catchments
Source: Copernicus journal article supplement (doi:10.5194/acp-2020-816), 2020-08-31
Supplement: Supplementary file 1 [file acp-2020-816-supplement.pdf]

## Supporting Information

### Soil-atmosphere exchange flux of total gaseous mercury (TGM) in subtropical and temperate forest catchments

Jun Zhou <sup>a, b, c</sup>, Zhangwei Wang <sup>a, c, \*</sup>, Xiaoshan Zhang <sup>a, c</sup>, Charles T. Driscoll <sup>d</sup>, Che-Jen Lin <sup>e</sup>

a. State Key Laboratory of Urban and Regional Ecology, Research Center for Eco-Environmental Sciences, Chinese Academy of Sciences, Beijing 100085, China.

b. Key Laboratory of Soil Environment and Pollution Remediation, Institute of Soil Science, Chinese Academy of Sciences, Nanjing 210008, China.

c. University of Chinese Academy of Sciences, Beijing 100049, China.

d. Department of Civil and Environmental Engineering, Syracuse University, 151 Link Hall, Syracuse, New York 13244, United States.

e. Center for Advances in Water and Air Quality, Lamar University, Beaumont, Texas 77710, United States.

\* Corresponding author: Zhangwei Wang

E-mail address: wangzhw@rcees.ac.cn (Z. Wang); Phone: +86 10 62849168.

No.18 Shuangqing Road, Beijing 100085, China

First author e-mail: zhoujun@issas.ac.cn (J. Zhou); Phone: +86 25 86881319.

No.73 East Beijing Road, Nanjing 210008, China.

#### Contents:

**15 Pages**

**1 Tables**

**9 Figures**

## ***Supporting Text:***

### ***Site description***

In the subtropical forest, the mean annual precipitation, temperature and daily relative humidity at the TFP are 1230 mm, 18.2 °C and 95%, respectively. The ecosystem type at the TFP study site is a Masson Pine dominated forest, with some associated ever-green broad-leaved species. Trees were planted in the 1960s. The soil is typically mountain yellow earth (corresponding to a Haplic Acrisol in FAO). The soil is acidic, with a pH of 3.79. From previous studies, the mean Hg concentrations in precipitation, throughfall, litterfall and organic soils were 55.3 ng L<sup>-1</sup>, 98.9 ng L<sup>-1</sup>, 104.8±18.6 ng g<sup>-1</sup> and 191 ± 65 ng g<sup>-1</sup>, respectively, with an annual Hg input of 291.2 µg m<sup>-2</sup> yr<sup>-1</sup>.(Zhou et al., 2016;Zhou et al., 2015)

The temperate forest is located in the Xiaolongmen National Forest Park of Mt. Dongling near the Beijing Forest Ecosystem Research Station, Chinese Academy of Sciences (40°00' N, 115°26' E), which is located 110 km southwest of Mega-city Beijing in North China. The elevation and is 1300 m asl. The annual average rainfall is 612 mm and mean relative humidity is 66%. The Mt. Dongling is one of the Chinese Ecosystem Research Network (CERN) and Diversitas Western Pacific and Asia (DIWPA) monitoring sites. The region's climate is predominantly warm temperate continent monsoon climate with an annual average temperature 4.8 °C. Cool and dry climate in the study area has resulted in deep litter and high organic matter concentrations (Fang et al., 2007). The study area is a mature and secondary forest protected since the 1950s following the extensive deforestation. To characterize the terrestrial surface influence on the Hg fluxes, different ecosystems were selected to study the air-surface Hg fluxes from forest soil and snow at a sub-catchment (40 ha) in the temperate forest, including the Chinese pine forest, larch forest, wetland, mixed broad-leaved forest and open field. The five sites were located about 200-300 m distance individually.

### ***Environmental measurements***

Daily meteorological parameters were collected and averaged over 5-min intervals. Daily air temperature and solar radiation were monitored using a TP 101 digital thermometer and a GLZ-C photo synthetically radiometer (TOP Ltd. China), respectively, during diurnal measurements. Percent moisture was monitored with Time Domain Reflectometry (TDR) Hydra Probe II (SDI-12/RS485) and a Stevens water cable tester (USA). Measurements were taken at the same time with gold trap collection. Solar radiation was collected with a weather station (Davis Wireless Vantage VUE 06250 Weather Station, Davis Instruments, Hayward, CA) located in the TFP Forest Station about 500 m away from the sub-catchment.

For each DFC sampling location, bulk soil samples were collected from the DFC footprints (0–5 cm) in each month after the end of the measurement period. Soil samples were dried and homogenized, and completely ground to a fine powder in a pre-cleaned stainless-steel blender. The total Hg concentration in the soil samples was determined using a DMA-80 direct Hg analyzer (Milestone Ltd., Italy). SOM content in soils was determined using the sequential loss on ignition

68 (LOI) method.(Zhou et al., 2013) A homogenized soil sample (WS) was dried at 105 °C for about  
69 12- 24 h to obtain the dry weight of the samples ( $DW_{105}$ ). The heated dry sample was then burned  
70 at 550 °C for 4 h and the weight of the sample after heating at 550 °C was  $DW_{550}$ . Thus, the TOM  
71 concentration ( $LOI_{550}$ ) was calculated according to the following formula:

72 
$$LOI_{550}=100(DW_{105}- DW_{550})/WS.$$

73 **Table S1.** Characteristics and detail of measurements at five plots in the forested sub-catchments.

| Forest type        | Plots    | Locations                             | Date of flux measurement |                                 |               |               | Area (%) |
|--------------------|----------|---------------------------------------|--------------------------|---------------------------------|---------------|---------------|----------|
|                    |          |                                       | Spring                   | Summer                          | Autumn        | Winter        |          |
| Subtropical forest | Plot S-A | Top-slope of coniferous forest        | 5 Mar-7 Apr              | 17 -19 Jun; 1-31 Jul; 10-24 Aug | 3 Nov-6 Dec   | 24 Dec-14 Jan | 42.4     |
|                    | Plot S-B | Middle-slope of the coniferous forest | 5 Mar-7 Apr              | 17 -19 Jun; 1-31 Jul; 10-24 Aug | 3 Nov-6 Dec   | 24 Dec-14 Jan | 42.4     |
|                    | Plot S-C | Wetland                               | 5 Mar-7 Apr              | 1-31 Jul; 10-24 Aug             | 3 Nov-6 Dec   | 31 Dec-14 Jan | 2.9      |
|                    | Plot S-D | Broad-leaved forest                   | 5 Mar-7 Apr              | 17 -19 Jun; 1-31 Jul; 10-24 Aug | 3 Nov-6 Dec   | 24 Dec-14 Jan | 10       |
|                    | Plot S-E | Open field                            | 22 Mar-7 Apr             | 17 -19 Jun; 1-31 Jul; 10-24 Aug | 3-23 Nov      | 30 Dec-14 Jan | 2.3      |
| Temperate forest   | Plot T-A | Chinese pine forest                   | 28 Mar-25 Apr            | 12 Jul-10 Aug                   | 20 Sep-20 Oct | 10-16 Nov     | 14       |
|                    | Plot T-B | Larch forest                          | 28 Mar-25 Apr            | 12 Jul-10 Aug                   | 20 Sep-20 Oct | 10-16 Nov     | 8        |
|                    | Plot T-C | Wetland                               | 28 Mar-25 Apr            | 12 Jul-10 Aug                   | 20 Sep-20 Oct | 10-16 Nov     | 9        |
|                    | Plot T-D | Mixed broad-leaved forest             | 28 Mar-25 Apr            | 12 Jul-10 Aug                   | 20 Sep-20 Oct | 10-16 Nov     | 65       |
|                    | Plot T-E | Open field                            | 28 Mar-25 Apr            | 12 Jul-10 Aug                   | 20 Sep-20 Oct | 10-16 Nov     | 4        |

74 Note: Area percent was according to Zhu et al. (2013) at the subtropical forest and Zhou et al. (1999) at the temperate forest.

**Figure Captions:**

**Fig. S1.** Correlation between the averaged solar radiation (8:00-17:00) and air-surface Hg flux measured at daytime in Masson pine forests (a) and (b), wetland (c), evergreen broad-leaved forest (d) and open field (e) in the subtropical forest.

**Fig. S2.** Correlation between the averaged solar radiation (8:00-17:00) and air-surface Hg flux measured at daytime in Chinese pine forest (a), larch forest (b), wetland (c), mixed broad-leaved forest (d) and open field (e) in the temperate forest.

**Fig. S3.** Effects of rainfall events on annual soil-air TGM fluxes at the subtropical forest (A) and temperate forest (B).

**Fig. S4.** Correlation between the soil Hg concentrations ( $S_c \pm SD$ ) and soil-air Hg flux ( $F \pm SD$ ) under the forest canopy. Standard deviations of soil Hg concentrations were obtained from Hg concentrations in the four seasons (n=12). Because fluxes are often controlled by solar radiation for bare soils, the correlation analysis above does not include the open field (plot E).

**Fig. S5.** Soil-air TGM fluxes in the daytime and nighttime at the subtropical forest (A) and temperate forest (B).

**Fig. S6.** Correlation between the soil temperature and air-surface Hg flux measured in daytime and night in Masson pine forests (a) and (b), wetland (c), evergreen broad-leaved forest (d) and open field (e) in the subtropical forest.

**Fig. S7.** Correlation between the soil temperature and air-surface Hg flux measured in daytime and night in Chinese pine forest (a), larch forest (b), wetland (c), mixed broad-leaved forest (d) and open field (e) in the temperate forest.

**Fig. S8.** Correlation between the soil moisture and air-surface Hg flux measured in daytime and night in Chinese pine forest (a), larch forest (b), wetland (c), mixed broad-leaved forest (d) and open field (e) in the subtropical forest.

**Fig. S9.** Correlation between the soil moisture and air-surface Hg flux measured in daytime and night in Chinese pine forest (a), larch forest (b), wetland (c), mixed broad-leaved forest (d) and open field (e) in the temperate forest.

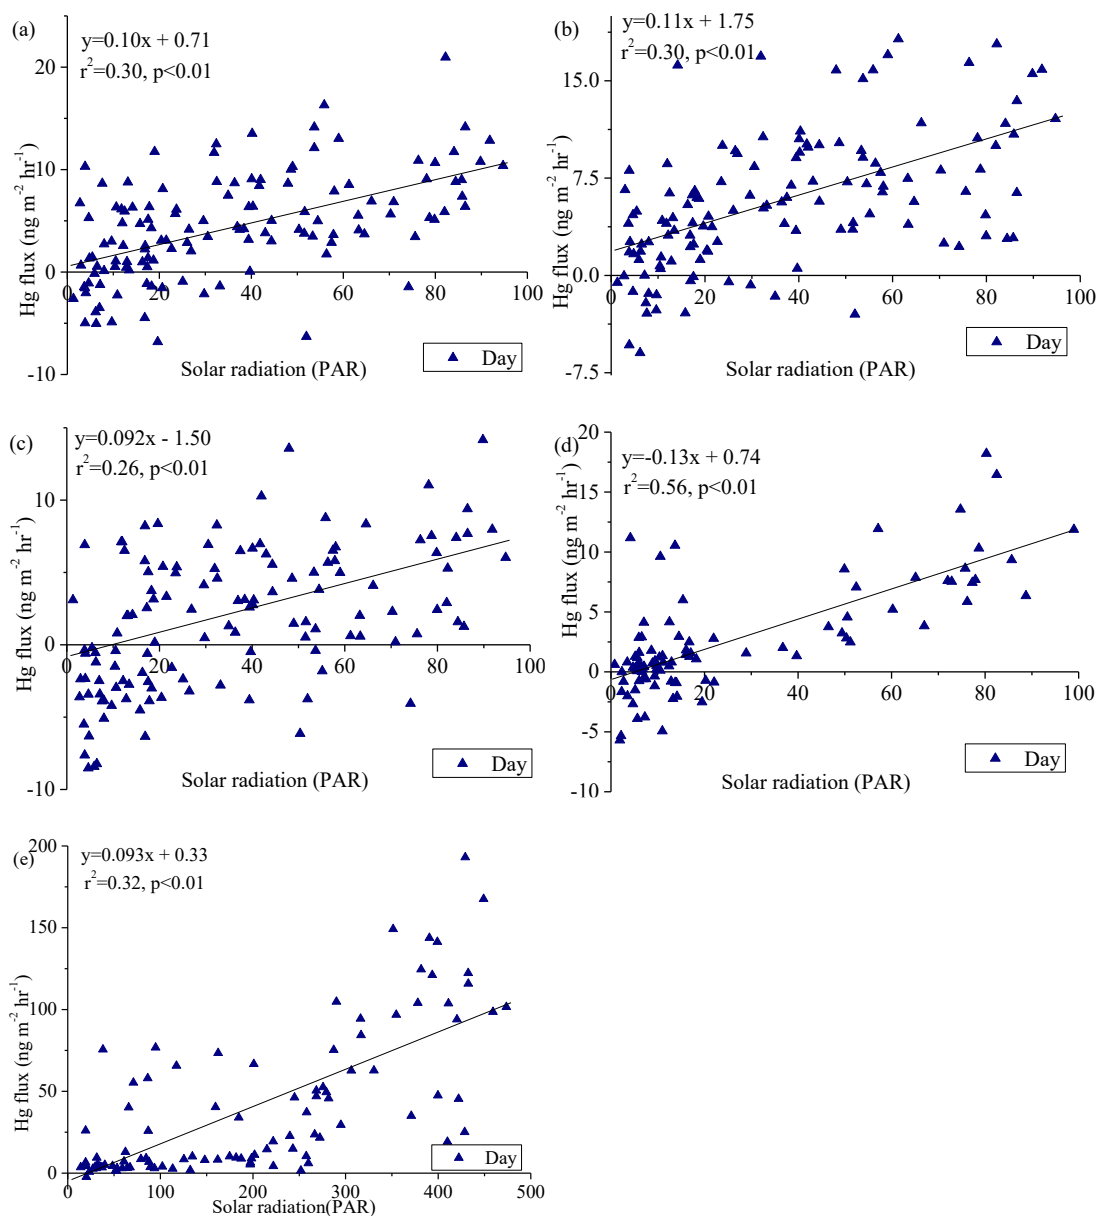

**Fig. S1.** Correlation between the averaged solar radiation (8:00-17:00) and air-surface Hg flux measured at daytime in Masson pine forests (a) and (b), wetland (c), evergreen broad-leaved forest (d) and open field (e) in the subtropical forest.

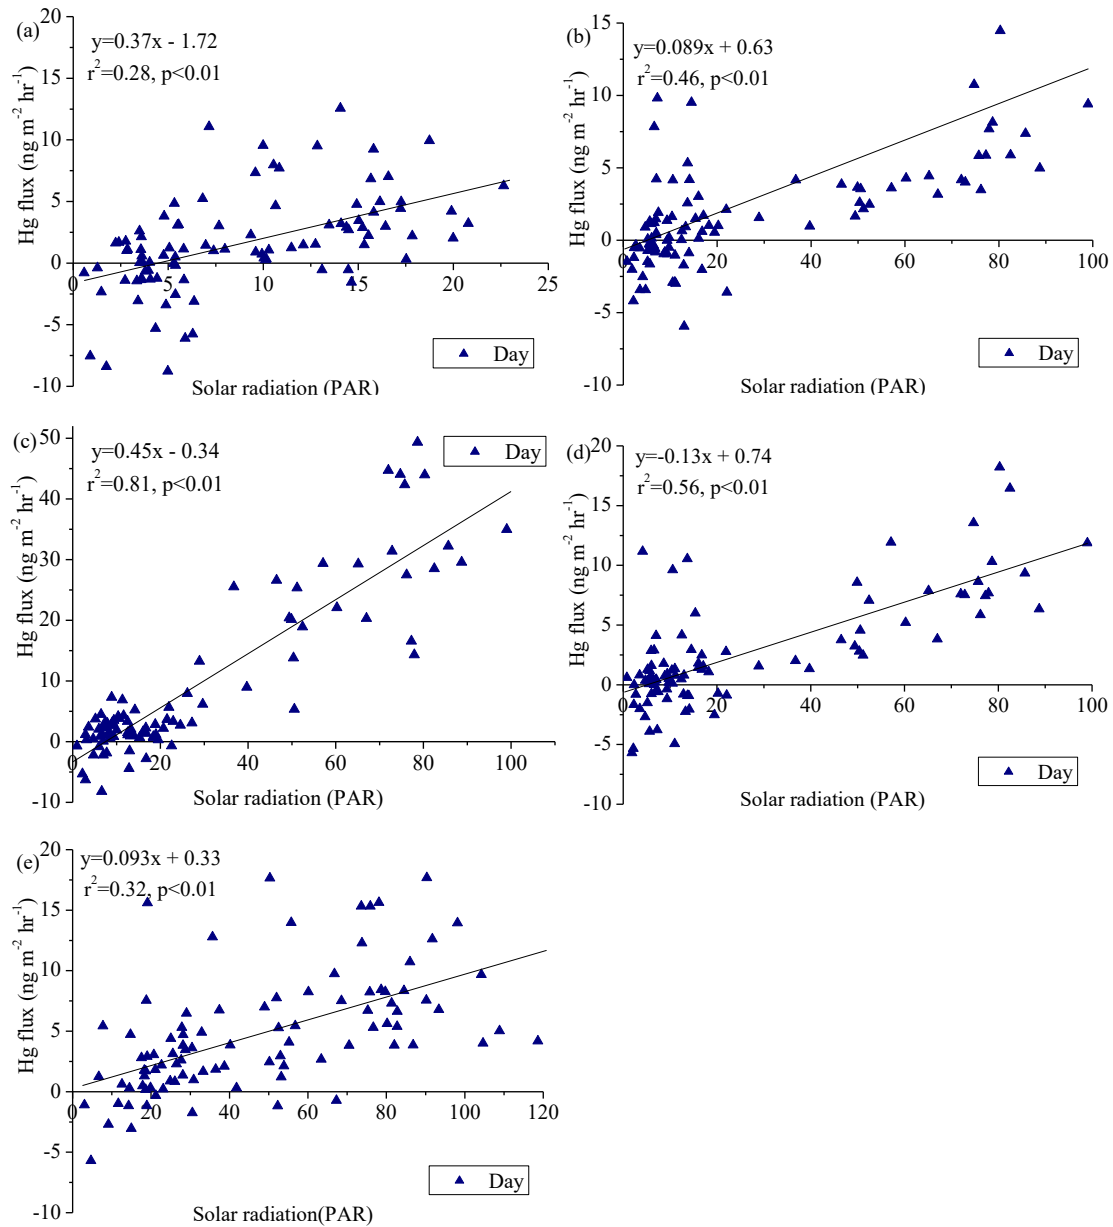

**Fig. S2.** Correlation between the averaged solar radiation (8:00-17:00) and air-surface Hg flux measured at daytime in Chinese pine forest (a), larch forest (b), wetland (c), mixed broad-leaved forest (d) and open field (e) in the temperate forest.

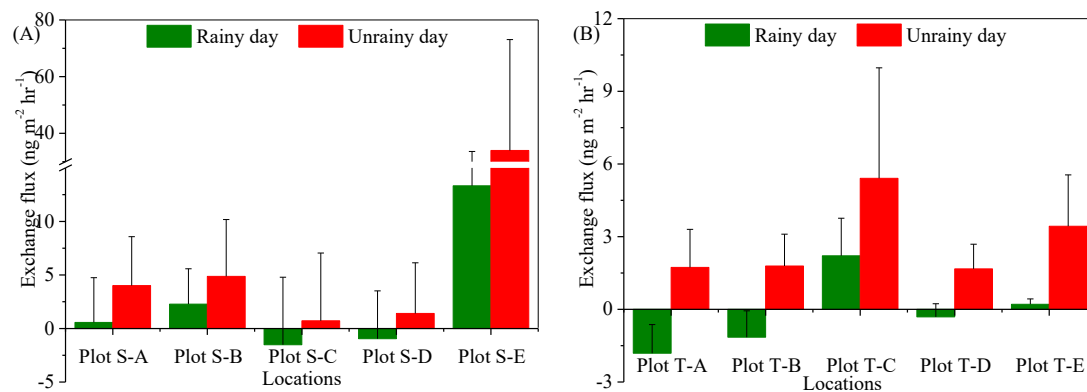

**Fig. S3.** Effects of rainfall events on annual soil-air TGM fluxes at Masson pine forests (Plot A) and (Plot B), wetland (Plot C), evergreen broad-leaved forest (Plot D) and open field (Plot E) at the subtropical forest (A), and at Chinese pine forest (Plot A), larch forest (Plot B), wetland (Plot C), mixed broad-leaved forest (Plot D) and open field (Plot E) at the temperate forest (B).



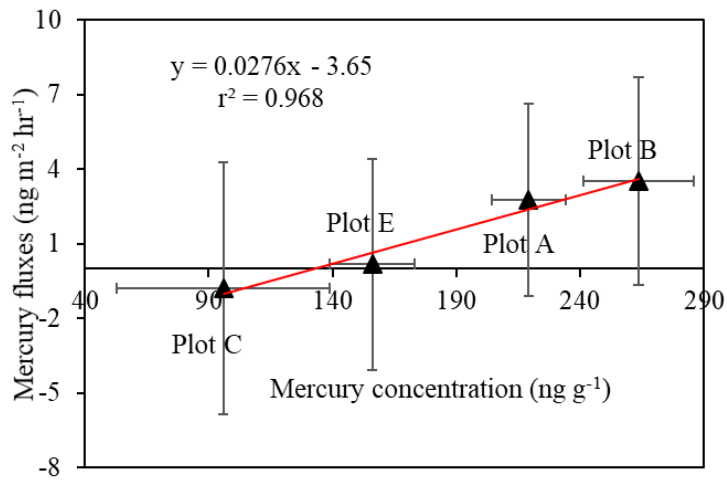

**Fig. S4.** Correlation between the soil Hg concentrations ( $S_c \pm SD$ ) and soil-air Hg flux ( $F \pm SD$ ) under the forest canopy. Standard deviations of soil Hg concentrations were obtained from Hg concentrations in the four seasons (n=12). Because fluxes are often controlled by solar radiation for bare soils, the correlation analysis above does not include the open field (plot E).

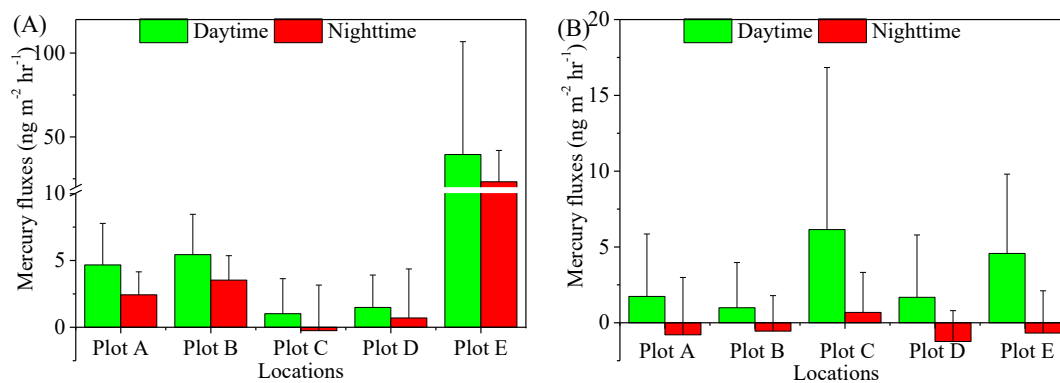

**Fig. S5.** Soil-air TGM fluxes in the daytime and nighttime at Masson pine forests (Plot A) and (Plot B), wetland (Plot C), evergreen broad-leaved forest (Plot D) and open field (Plot E) at the subtropical forest (A), and at Chinese pine forest (Plot A), larch forest (Plot B), wetland (Plot C), mixed broad-leaved forest (Plot D) and open field (Plot E) at the temperate forest (B).

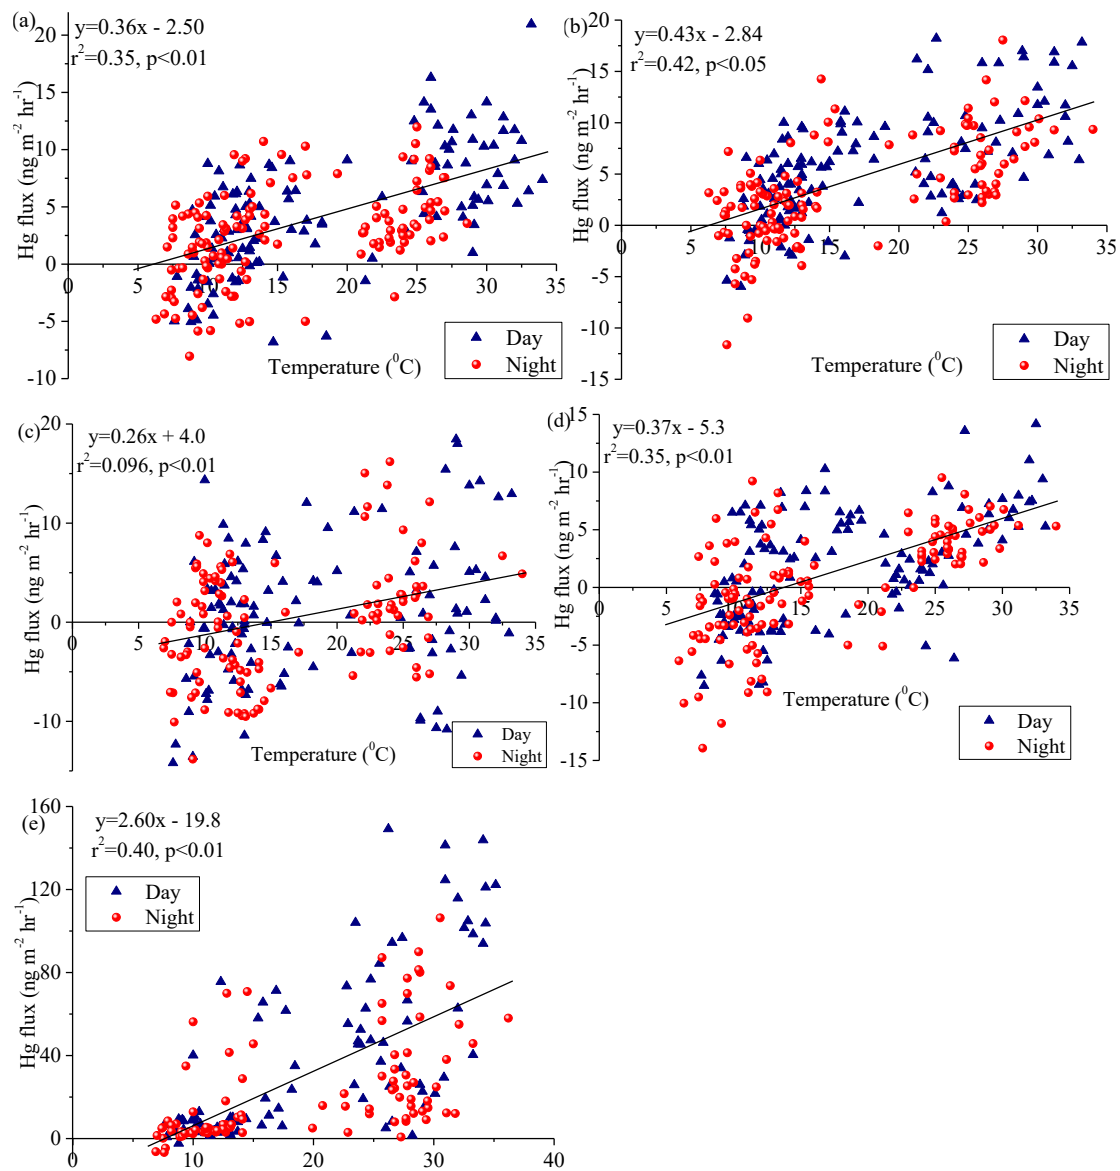

**Fig. S6.** Correlation between the soil temperature and air-surface Hg flux measured in daytime and night in Masson pine forests (a) and (b), wetland (c), evergreen broad-leaved forest (d) and open field (e) in the subtropical forest.

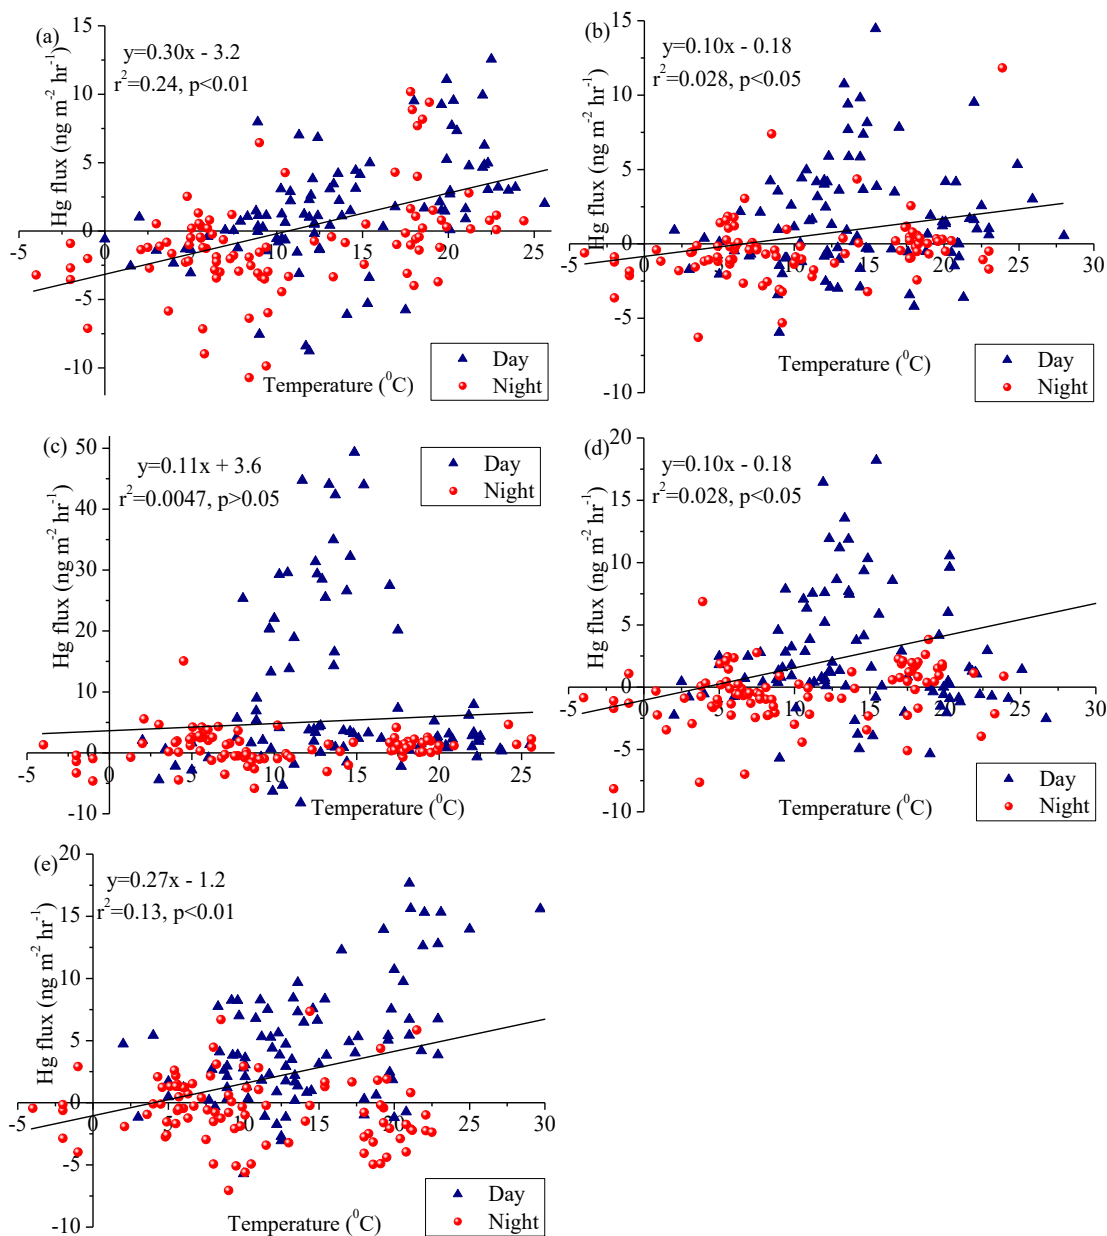

**Fig. S7.** Correlation between the soil temperature and air-surface Hg flux measured in daytime and night in Chinese pine forest (a), larch forest (b), wetland (c), mixed broad-leaved forest (d) and open field (e) at the temperate forest.

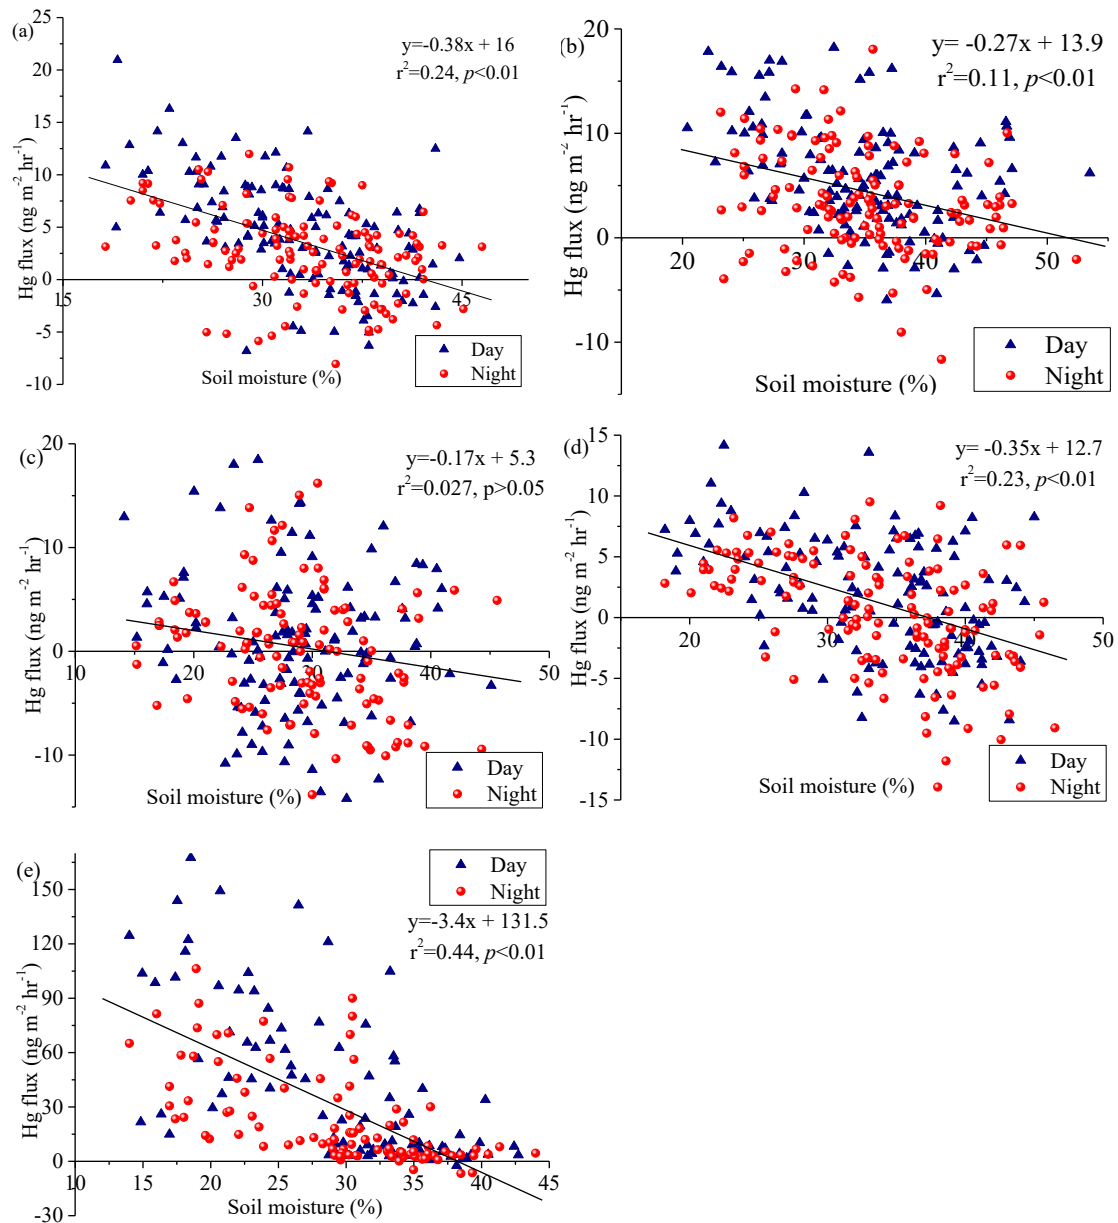

**Fig. S8.** Correlation between the soil moisture and air-surface Hg flux measured in daytime and night in Chinese pine forest (a), larch forest (b), wetland (c), mixed broad-leaved forest (d) and open field (e) at the subtropical forest.

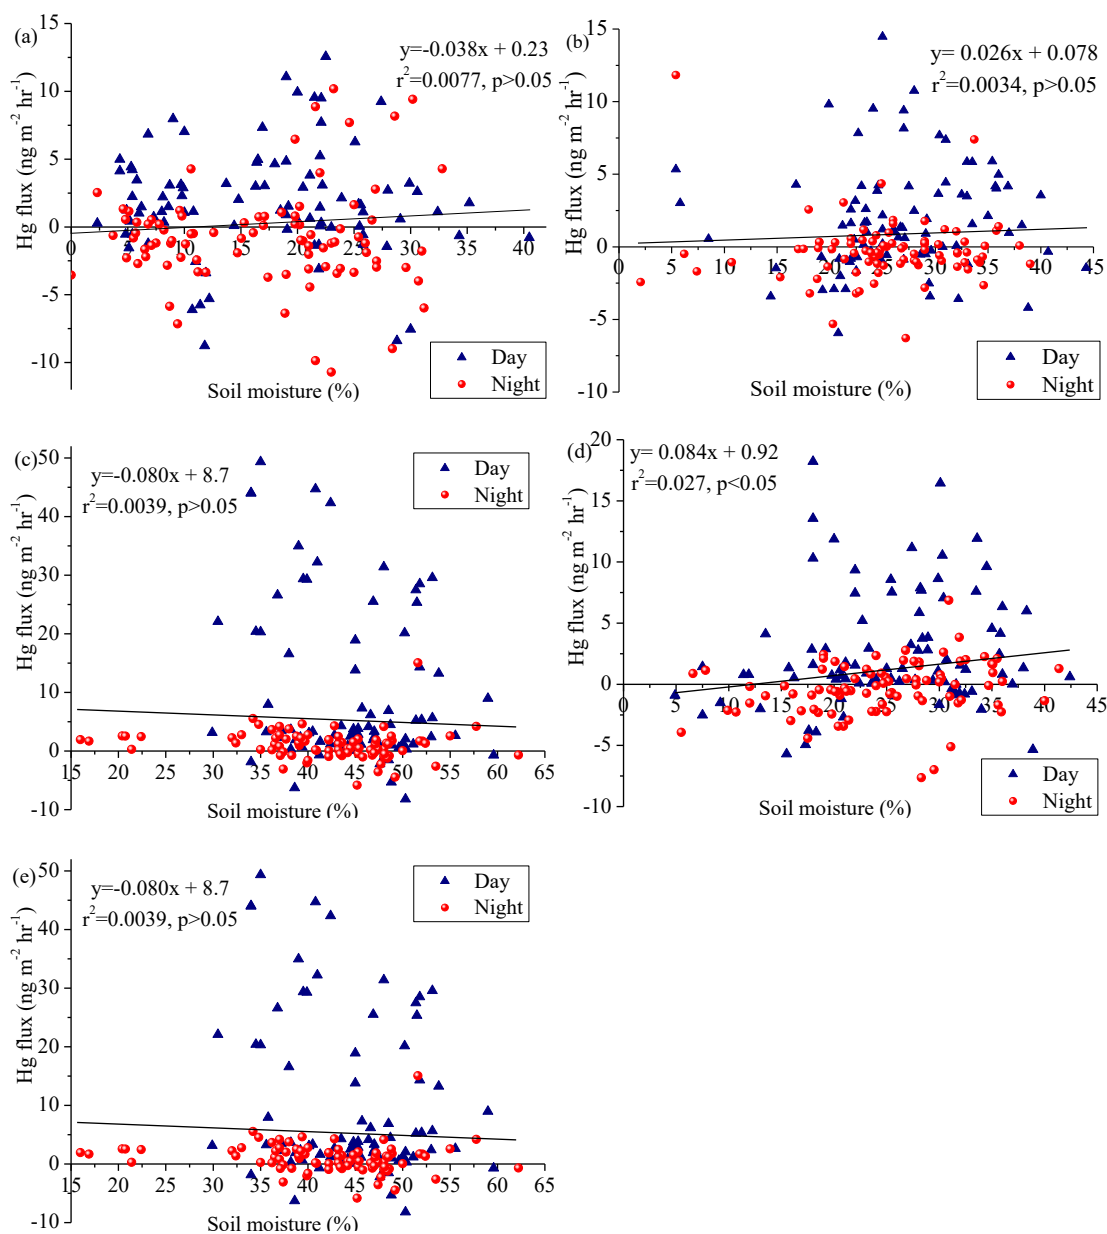

**Fig. S9.** Correlation between the soil moisture and air-surface Hg flux measured in daytime and night in Chinese pine forest (a), larch forest (b), wetland (c), mixed broad-leaved forest (d) and open field (e) at the temperate forest.

**References:**

- Zhou, H., Ma, K., and Fu, B.: Analysis of the impacts of human activities on landscape patterns in  
dangling mountain area of Beijing, *J Nat Resour*, 14, 117-122, 1999.
- Zhou, J., Feng, X., Liu, H., Zhang, H., Fu, X., Bao, Z., Wang, X., and Zhang, Y.: Examination of total  
mercury inputs by precipitation and litterfall in a remote upland forest of Southwestern China,  
*Atmospheric Environment*, 81, 364-372, 10.1016/j.atmosenv.2013.09.010, 2013.
- Zhou, J., Wang, Z., Zhang, X., and Chen, J.: Distribution and elevated soil pools of mercury in an acidic  
subtropical forest of southwestern China, *Environmental Pollution*, 202, 187-195,  
10.1016/j.envpol.2015.03.021, 2015.
- Zhou, J., Wang, Z., Sun, T., Zhang, H., and Zhang, X.: Mercury in terrestrial forested systems with highly  
elevated mercury deposition in southwestern China: The risk to insects and potential release from  
wildfires, *Environmental Pollution*, 212, 188-196, 10.1016/j.envpol.2016.01.003, 2016.
- Zhu, J., Mulder, J., Solheimslid, S. O., and Dörsch, P.: Functional traits of denitrification in a subtropical  
forest catchment in China with high atmogenic N deposition, *Soil Biology and Biochemistry*, 57,  
577-586, <https://doi.org/10.1016/j.soilbio.2012.09.017>, 2013.
